# Supplementary material for: Polymorphism in poly(vinylidene fluoride) nanoparticles prepared by a precipitation method: roles of the stirring rate, temperature and molecular weight
Source: Royal Society of Chemistry journal article supplement (doi:10.1039/d5ce00920k), 2025-01-01
Supplement: d5ce00920k1.pdf [file d5ce00920k1.pdf]

# Supporting Information of

## “Polymorphism in poly(vinylidene fluoride) nanoparticles prepared by precipitation method: Roles of stirring rate, temperature and molecular weight”

Jiameng Liang,<sup>a</sup> Ruihao Zheng,<sup>a</sup> Haipeng Li,<sup>a</sup> Wenpeng Zhao,<sup>b</sup> Shaojuan Wang,<sup>a\*</sup>

Hao Zhang,<sup>a\*</sup> Shouke Yan<sup>a,c</sup>

<sup>a</sup> Key Laboratory of Rubber-Plastics, Qingdao University of Science & Technology, Qingdao 266042, China.

<sup>b</sup> School of Chemical Engineering, Key Laboratory of Rubber-Plastics, Qingdao University of Science & Technology, Qingdao 266042, China

<sup>c</sup> State Key Laboratory of Chemical Resource Engineering, Beijing University of Chemical Technology, Beijing 100029, China.

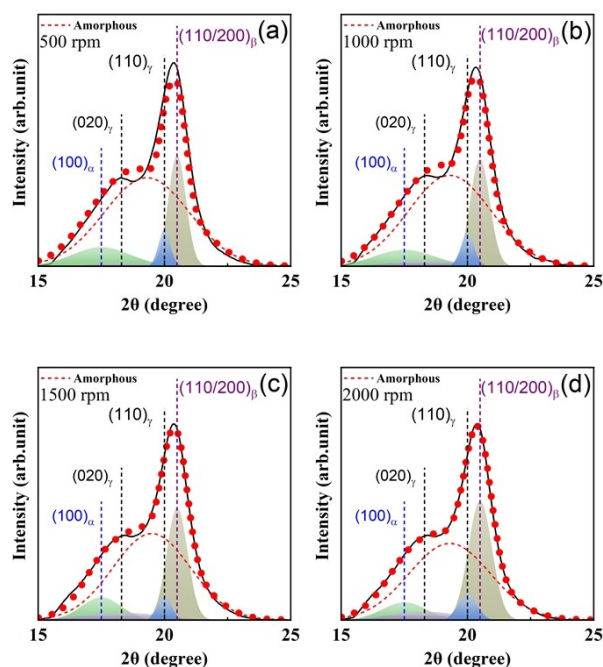

Figure S1. WAXRD curves and the corresponding curve deconvolution of PVDF nanoparticles prepared under different stirring rates (500 rpm (a), 1000 rpm (b), 1500 rpm (c), 2000 rpm (d)) at room temperature. The black lines are experimental data curves and the solid circles correspond to

the best-fitted dots.

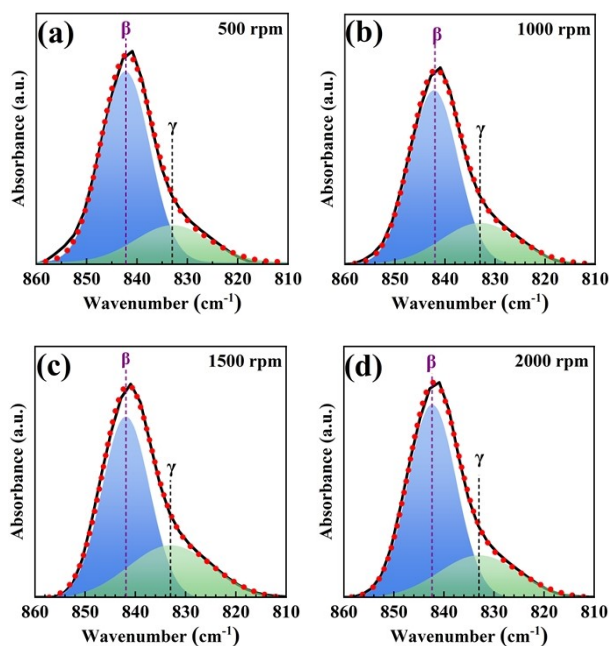

Figure S2. FTIR spectra (860–810 cm<sup>-1</sup>) deconvolution of PVDF nanoparticles prepared under different stirring rates (500 rpm (a), 1000 rpm (b), 1500 rpm (c), 2000 rpm (d)) at room temperature. The black lines are experimental data curves. The red solid circles are the best-fitted points.

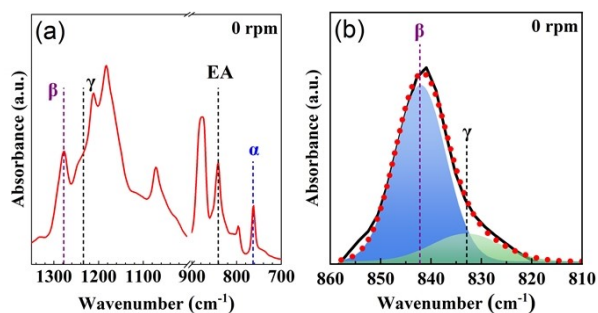

Figure S3. (a) a FTIR spectrum, (b) the fitted FTIR spectra (860–810 cm<sup>-1</sup>) of PVDF nanoparticles prepared under 0 rpm at room temperature, the black lines are experimental data curves and the red solid circles are the best-fitted points.
